# Supplementary material for: Tumor Protein (TP)-p53 Members as Regulators of Autophagy in Tumor Cells upon Marine Drug Exposure
Source: PubMed Central journal article supplement (PMC4999915; doi:10.3390/md14080154), 2016-08-16
Supplement: marinedrugs-14-00154-s001.pdf [file marinedrugs-14-00154-s001.pdf]

## Supplementary Materials: Tumor Protein (TP)-p53 Members as Regulators of Autophagy in Tumor Cells upon Marine Drug Exposure

Edward A. Ratovitski

**Figures S1–S6. Schematic representation of the selected autophagic gene promoters.** Promoter sequences were obtained from the UCSC website (<http://genome.ucsc.edu/>) and analyzed using the TFSEARCH software (<http://mbs.cbrc.jp/research/db/TFSEARCH.html>). TP63 responsive sequences were defined manually using the previously reported cognate sequence. Consensus sequences for the specific transcriptional factors were highlighted in bold with the grey background and boxed. The sequences used to amplify the ChIP-precipitated DNA are underlined.

```

-1900 GCACGTAGCC ACCTGTTTAC TCATTTTTCT CTTGCAATTT TGCCACGGGT
-1850 GGTGCAATCT TTGCTCTTCT TGTCCCCAC CCCTAAGCGC TGGGAGCTCC
-1800 TG CAGGCGGG TCTTGTTCTC ATG CTGTCAA CTGCAGCACT TACCTCGCAG
                TP53
-1750 CGTGTGCTCT CTGGGCAGGC CGGTGTGCAG CAGGCACTCC AGGATGTGAG
-1700 TGAATGCTAT GGCTGACTAC GGGGCACTGT GGAACCTCTT TATTGGGAAA
-1650 ACAA CATGG TGGGCCAGGA GACCTCTTGT CCCTTCCAGC TCGGTGGCTT
                TP53
-1600 CTGGCCCCCA GTCCAGGGTC GGGAGTCTGT GTGTCCTGCG GCCTGGAGGA
                TP63
-1550 TGAGCTGGGT GCAGGTAAAA GGCATCCAGG A CTTGCTGAT CCAGCCCAGG
                TP63
-1500 GCAT CAGGCT GTCCAGCTGC TGGGCTGCTC TGGGAGGCAG CATGGAGGGT
                TP63
-1450 CCTGGCTGAA GTGTGTGTTT CTGGGCTGTT ACTTTAGGAC TGTA CTGAAG
-1400 GCTGGGTTGG TGAGCATTGT TTAGAAT CAT GCATTTGCAA AAGCAAGTCT
                TP53
-1350 TGCACGTGGT GAAAGCCATT CCAACTAGCG CGCAACGTGT ACGGTGAACA
-1300 GACTA AACTT TTCCCCGGTC CTCTCTCCA GAGCAATCGC TGTGGCTGT
-1250 GTCTTCTGTG AGTGAGCCCC CGGGCTCTTT TGGCTGCCGG CGGTGTGACT
-1200 TTGGACACAT TCTCCA AACTT TTCTCCGCCT TGATTTCTC ATCTGTAAAA

```

Figure S1. ATG1/ULK1 promoter.

-2000 **CAGGAAGTTG AATTTTAAGT CAAATCAAG**T AATCACCTTT CACCTATTGG  
**TP73**

-1950 GTTTCTTCAT ACATAG**TTTC CCCCAA**ACA ATTTTTTTTT TTTTTTGAGA  
**STAT**

-1900 CAGGGTCTCT CTCTGTTACC TAGACTGCAG TGATACAATC ATAGCTCACT  
-1850 GCAACCTTGA CCTCCTGGGC T**CATGTAATC CTCCTTCCTC AAG**CACTGGA  
**TP53/TP73**

-1800 GTAGCTGGGA CTGTAGGCG**C ATGCCACCAT G**CCCTCCTAA TTTTTGTGTT  
**TP53**

-1750 TTTTGTAGAG ATGTGGTCTT GC**CATGTTGT GCAGGCTGGT CTTCAAG**TCC  
**TP53/TP73**

-1700 TGGGCT**CAAG CTATCCTCTT ACCTG**GGCCT CCCAAAGTGC TGGGATTACA  
**TP63**

-1650 GG**CAAGAGCC ACTGTGCCTG G**TCCCAACAT TTTGTTAGGA AATAATTTTG  
**TP63**

-1600 AACACACAGC AAAGCTGAAC AAATTTTACA GTGAATACCC ATTTACAATG  
-1550 AACCTAGATT CTACCATCTA GATTCTA**CCA AT**ATATTTTA CCATTATATT  
**NF-Y**

-1500 CTACCATTAT ATTTTACTAT ATTTGGTTAA TCACATATTT ATCCATCTAT  
-1450 GCGCCCCTAA ATCCATCTTA TTTTTTAGAT ACATTTTAAA GGAAATTTTA  
-1400 TATACTTTTG TCTGACACTG GGAAGGCAAT GCACCTTAAT CCCACAAGCT  
-1350 TTCTTACAGA GGCTAATAGC TGTTTACTGG GGACACTGTA GTGAGGATTT  
-1300 CTGCATTGAG TAGGTGAAGA GGACCATAAC TGTGGCTTTC AAACTTTTCT  
-1250 GACTGCTACC CTTACTAAGA AATGTATTTT ACATTCCTAT CCAGTGTACA

Figure S2. ATG5 promoter.

-700 GATTACAGGC GCACGCCA**CC AAT**GCCAGCT AATTGTATTT TTTAGTAGAG  
**NF-Y**

-650 ACGGGATTTA ACCATTTTGG C**CAGGCTGGT CTCGAACTCC TGACCTTG**TG  
**TP63**

-600 ATCCGCCCGC CTCGGCCTCC CAAAGTGCTG GAATTA**CAAG CGTGAGCCAC**  
**TP53**

-550 **CATG**CCCGGC CTTTTGTTGT TGCTGTTGTT GTTCTGAGAT GGAGCCTTGC  
-500 CCTGTCGCC AGGCTGGAGT GCAGTGGCCC GATCTCGGCT CACTGCAACC  
-450 TCCACCTCC AGGTTCAAGC GATTCTCCTG CCTCAGCCTC CCGAGTAGCT  
-400 GGGATTAAGC TGGGATTATA GGCGTGCCCC ACCACGCCCG GCTAGTTTTT  
-350 GTATTTTTAG TAGAGACGGG GTTTCCTGT GTTGGC**CAGG CTGGTCTCGA**  
-300 **ACTCCTGA****CC TCACGTGAT**C CGCCCTCCTC GGCCTCCC**CA AGTGCTGAGA**  
**TP63 SREBP-1 TP63/TP73**

-250 **TTACAGG**CGT GAGCCACCGC GCCCGCCGCC CCCTGAATTT AGAGAATAGC  
-200 GGAGCCTCCC CATTCTCTGC GGCCCTGGCT CCTACACTTC CCGTGGTAAC  
-150 CTTGTTTCATC CGCTGAAGCC CGCTGCTTTT CCCAGCCCGG CCTCTGGGGG  
-100 CCGTGCCGG GCCTGTGAGC CTGTGGAC**CA GGAGCTCCTG CTGCCTG**CGT  
**TP63**

-50 AGCGTCACGT CCGGTCTCGG CGGAAGTTTT CCGGCGGCTA CCGGGAAGTC

Figure S3. ATG6/BECN1 promoter.
